# Supplementary material for: On the resistivity, temperature coefficient of resistance, and ampacity of Cu–CNT and Ni–CNT composites
Source: Royal Society of Chemistry journal article supplement (doi:10.1039/d1ra07048g), 2021-01-01
Supplement: d1ra07048g1.pdf [file d1ra07048g1.pdf]

## Supplementary information

EDX spectra (Figure 1) confirm the presence of Cu and Ni in the CNT@PdaCu and CNT@PdaNi carpets, respectively. It was verified that the Al and S detected came from the support used for EDX while Fe (present in all the samples) came from the catalysts used to grow the CNT.

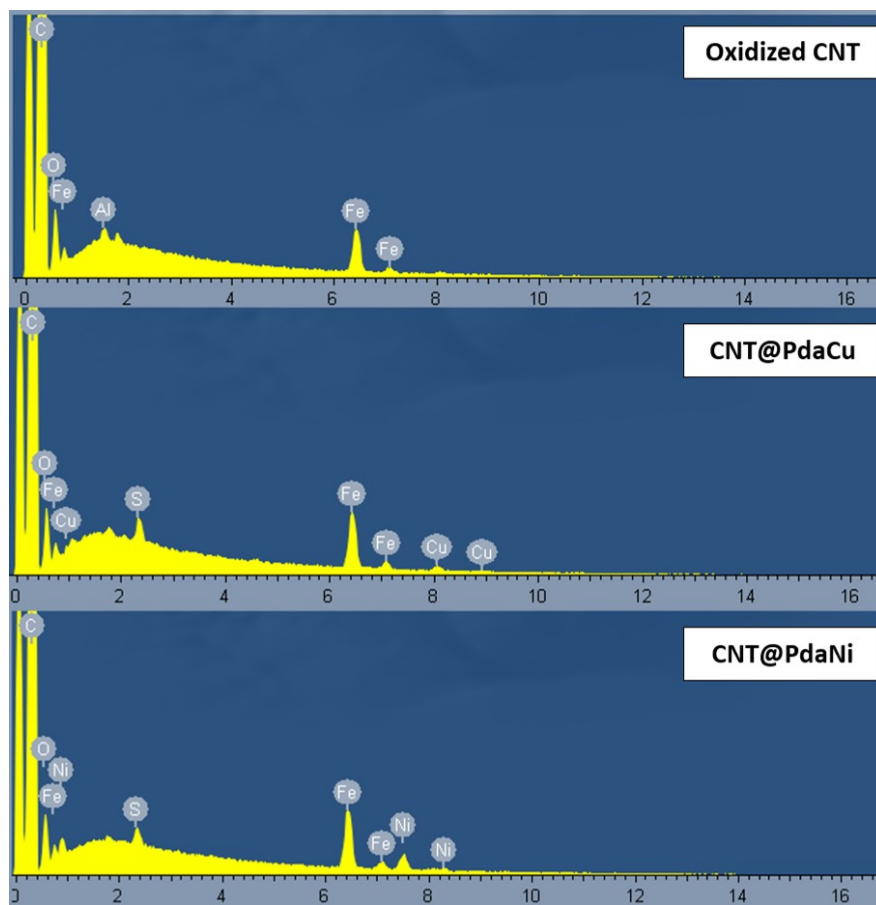

**Figure 1.** EDX spectra of oxidized CNT, CNT@PdaCu, and CNT@PdaNi carpets.

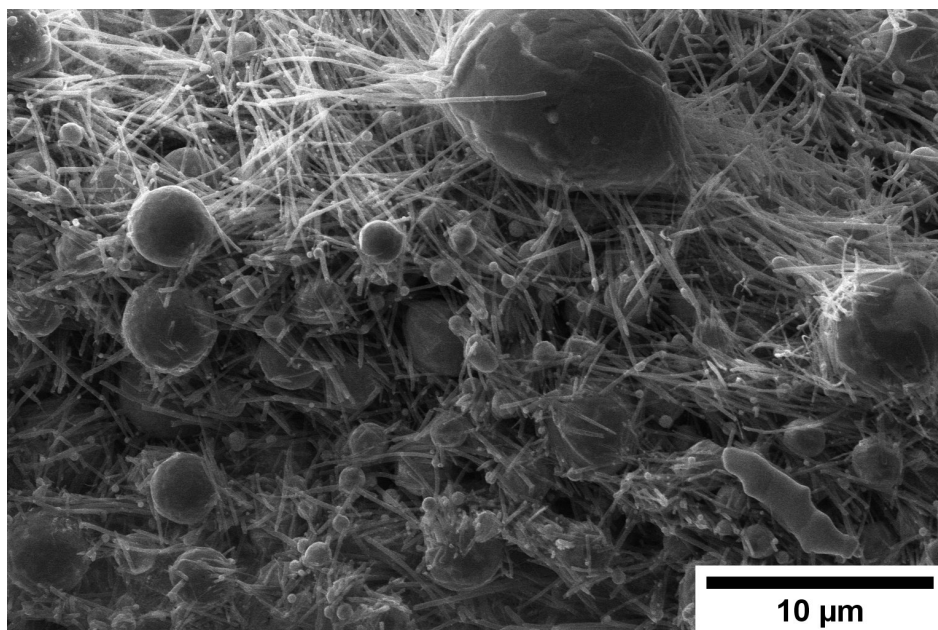

**Figure 2.** Zoom on the Ni-CNT ampacity line failure zone (annealed at 873 K).
